# Supplementary material for: Affective Face Processing Modified by Different Tastes
Source: Front Psychol. 2021 Mar 12;12:644704. doi: 10.3389/fpsyg.2021.644704 (PMC8006344; doi:10.3389/fpsyg.2021.644704)
Supplement: Supplementary file 1 [file Data_Sheet_1.xlsx]

## Sheet: data analysis
		平均数	标准差			三因素被试内(3index(强度、愉悦度、唤醒度) × 2 taste (甜、酸) × 6 time))						配对样本描述统计						配对样本检验
t1_2	甜强度1	2.85	0.988087			变异来源	df	F	显著性	偏η2				平均值	个案数	标准 误差平均值				配对差值
t1_3	甜愉悦度1	3.25	1.20852			被试间						配对 1	taste1index1time1	4.05	20	0.223							差值 95% 置信区间
t1_4	甜唤醒度1	2.7	1.0311			被试内							taste2index1time1	2.85	20	0.221				平均值	标准 偏差	标准 误差平均值	下限	上限	t	自由度	Sig.（双尾）
s1_2	酸强度1	4.05	0.998683			index	2	18.063***	0.001	0.487		配对 2	taste1index1time2	4.1	20	0.204		配对 1	taste1index1time1 - taste2index1time1	1.2	1.105	0.247	0.683	1.717	4.857	19	0	第5s时，甜味强度和酸味强度存在差异
s1_3	酸愉悦度1	1.95	0.759155			taste	1	0.15	0.703	0.008			taste2index1time2	3.45	20	0.256		配对 2	taste1index1time2 - taste2index1time2	0.65	1.387	0.31	0.001	1.299	2.096	19	0.05	第1min时，甜味强度和酸味强度存在差异
s1_4	酸唤醒度1	3.7	1.21828			time	1.897	4.803	0.15	0.202		配对 3	taste1index1time3	3.85	20	0.196		配对 3	taste1index1time3 - taste2index1time3	0.55	1.572	0.352	-0.186	1.286	1.565	19	0.134
t2_2	甜强度2	3.45	1.14593			index × taste	2	20.458***	0.001	0.518			taste2index1time3	3.3	20	0.282		配对 4	taste1index1time4 - taste2index1time4	0.25	1.585	0.354	-0.492	0.992	0.705	19	0.489
t2_3	甜愉悦度2	3.35	0.988087			index × time	3.61	0.514	0.707	0.026		配对 4	taste1index1time4	3.5	20	0.246		配对 5	taste1index1time5 - taste2index1time5	0.45	1.791	0.4	-0.388	1.288	1.124	19	0.275
t2_4	甜唤醒度2	2.95	1.09904			taste × time	5	1.046	0.395	0.052			taste2index1time4	3.25	20	0.28		配对 6	taste1index1time6 - taste2index1time6	0.05	1.82	0.407	-0.802	0.902	0.123	19	0.904
s2_2	酸强度2	4.1	0.91191			index × taste × time	4.397	3.19*	0.014	0.144		配对 5	taste1index1time5	3.45	20	0.285		配对 7	taste1index2time1 - taste2index2time1	-1.3	0.801	0.179	-1.675	-0.925	-7.255	19	0	第5秒时，甜味愉悦度和酸味愉悦度存在差异
s2_3	酸愉悦度2	2.2	1.15166			总计							taste2index1time5	3	20	0.299		配对 8	taste1index2time2 - taste2index2time2	-1.15	1.424	0.319	-1.817	-0.483	-3.611	19	0.002	第1min时，甜味愉悦度和酸味愉悦度存在差异
s2_4	酸唤醒度2	3.8	1.19649									配对 6	taste1index1time6	3	20	0.324		配对 9	taste1index2time3 - taste2index2time3	-1.15	1.089	0.244	-1.66	-0.64	-4.721	19	0	第2min时，甜味愉悦度和酸味愉悦度存在差异
t3_2	甜强度3	3.3	1.26074			变量：taste（甜1、酸2）、index（强度1、愉悦度2、唤醒度3）、time（1、2、3、4、5、6）							taste2index1time6	2.95	20	0.294		配对 10	taste1index2time4 - taste2index2time4	-1.05	1.191	0.266	-1.607	-0.493	-3.943	19	0.001	第3min时，甜味愉悦度和酸味愉悦度存在差异
t3_3	甜愉悦度3	3.2	1.00525									配对 7	taste1index2time1	1.95	20	0.17		配对 11	taste1index2time5 - taste2index2time5	-1.1	1.119	0.25	-1.624	-0.576	-4.395	19	0	第4min时，甜味愉悦度和酸味愉悦度存在差异
t3_4	甜唤醒度3	2.85	1.1821										taste2index2time1	3.25	20	0.27		配对 12	taste1index2time6 - taste2index2time6	-0.5	1.235	0.276	-1.078	0.078	-1.81	19	0.086
s3_2	酸强度3	3.85	0.875094									配对 8	taste1index2time2	2.2	20	0.258		配对 13	taste1index3time1 - taste2index3time1	1	1.257	0.281	0.412	1.588	3.559	19	0.002	第5秒时，甜味唤醒度和酸味唤醒度存在差异
s3_3	酸愉悦度3	2.05	0.887041										taste2index2time2	3.35	20	0.221		配对 14	taste1index3time2 - taste2index3time2	0.85	1.268	0.284	0.257	1.443	2.998	19	0.007	第1min时，甜味唤醒度和酸味唤醒度存在差异
s3_4	酸唤醒度3	3.65	1.1821									配对 9	taste1index2time3	2.05	20	0.198		配对 15	taste1index3time3 - taste2index3time3	0.8	1.281	0.287	0.2	1.4	2.792	19	0.012	第2min时，甜味唤醒度和酸味唤醒度存在差异
t4_2	甜强度4	3.25	1.25132										taste2index2time3	3.2	20	0.225		配对 16	taste1index3time4 - taste2index3time4	0.45	1.504	0.336	-0.254	1.154	1.339	19	0.197
t4_3	甜愉悦度4	3	1.1239									配对 10	taste1index2time4	1.95	20	0.235		配对 17	taste1index3time5 - taste2index3time5	0.65	1.182	0.264	0.097	1.203	2.459	19	0.024	第4min时，甜味唤醒度和酸味唤醒度存在差异
t4_4	甜唤醒度4	2.8	1.28145										taste2index2time4	3	20	0.251		配对 18	taste1index3time6 - taste2index3time6	0.5	1.395	0.312	-0.153	1.153	1.602	19	0.126	第5min时，甜味唤醒度和酸味唤醒度存在差异
s4_2	酸强度4	3.5	1.10024									配对 11	taste1index2time5	1.8	20	0.236
s4_3	酸愉悦度4	1.95	1.05006										taste2index2time5	2.9	20	0.25
s4_4	酸唤醒度4	3.25	1.25132									配对 12	taste1index2time6	2.1	20	0.261
t5_2	甜强度5	3	1.33771										taste2index2time6	2.6	20	0.245
t5_3	甜愉悦度5	2.9	1.11921									配对 13	taste1index3time1	3.7	20	0.272
t5_4	甜唤醒度5	2.6	1.18766										taste2index3time1	2.7	20	0.231
s5_2	酸强度5	3.45	1.2763									配对 14	taste1index3time2	3.8	20	0.268
s5_3	酸愉悦度5	1.8	1.05631										taste2index3time2	2.95	20	0.246
s5_4	酸唤醒度5	3.25	1.29269									配对 15	taste1index3time3	3.65	20	0.264
t6_2	甜强度6	2.95	1.31689										taste2index3time3	2.85	20	0.264
t6_3	甜愉悦度6	2.6	1.09545									配对 16	taste1index3time4	3.25	20	0.28
t6_4	甜唤醒度6	2.55	1.19097										taste2index3time4	2.8	20	0.287
s6_2	酸强度6	3	1.45095									配对 17	taste1index3time5	3.25	20	0.289
s6_3	酸愉悦度6	2.1	1.16529										taste2index3time5	2.6	20	0.266
s6_4	酸唤醒度6	3.05	1.43178									配对 18	taste1index3time6	3.05	20	0.32
													taste2index3time6	2.55	20	0.266
t代表甜，s代表酸，t1代表第一个时间点，t1_2代表甜味第一个时间点的强度，t1_3代表第一个时间点的愉悦度，t1_4第一个时点的唤醒度

## Sheet: data
taste1index1time1	taste1index1time2	taste1index1time3	taste1index1time4	taste1index1time5	taste1index1time6	taste1index2time1	taste1index2time2	taste1index2time3	taste1index2time4	taste1index2time5	taste1index2time6	taste1index3time1	taste1index3time2	taste1index3time3	taste1index3time4	taste1index3time5	taste1index3time6	taste2index1time1	taste2index1time2	taste2index1time3	taste2index1time4	taste2index1time5	taste2index1time6	taste2index2time1	taste2index2time2	taste2index2time3	taste2index2time4	taste2index2time5	taste2index2time6	taste2index3time1	taste2index3time2	taste2index3time3	taste2index3time4	taste2index3time5	taste2index3time6
3	2	3	2	1	1	2	2	2	2	1	2	3	2	3	2	2	1	2	3	2	3	2	1	4	4	4	4	4	3	4	4	3	3	2	1
3	4	4	3	4	4	2	2	1	2	1	2	2	3	4	3	3	4	2	2	3	4	3	4	3	3	3	4	3	3	2	2	2	3	3	4
4	5	3	5	5	4	2	2	2	1	1	1	3	4	4	4	4	3	1	2	3	3	4	4	3	3	3	3	3	3	3	3	3	3	3	3
4	3	3	3	2	2	3	3	3	3	3	3	3	3	3	3	3	3	4	4	3	3	3	3	4	3	3	3	3	3	3	3	3	3	3	3
5	4	4	2	4	1	3	3	3	2	2	1	2	1	1	1	1	1	3	2	2	1	1	1	4	3	2	1	1	1	2	2	1	1	1	1
1	3	4	3	3	4	1	1	1	1	1	1	1	3	3	3	2	3	1	2	1	2	1	1	1	2	2	1	1	1	1	2	2	1	1	1
4	4	5	5	5	5	2	1	2	1	1	1	4	5	5	5	5	5	3	4	4	4	3	3	3	4	4	4	4	3	3	3	3	3	3	3
4	3	3	3	4	5	1	3	2	1	1	1	3	3	3	2	4	5	2	2	2	1	1	1	2	2	2	2	2	1	1	1	1	1	1	1
4	5	4	4	3	3	2	2	2	1	2	3	4	5	4	4	3	3	3	5	5	5	5	4	4	4	5	4	4	4	4	4	5	5	5	4
3	4	4	5	5	5	3	4	4	5	5	5	3	4	5	5	5	5	4	5	5	5	5	5	5	4	4	5	5	5	4	4	5	5	5	5
5	5	5	4	3	1	1	1	1	1	1	3	5	5	4	4	3	1	2	4	3	3	3	3	2	4	3	3	2	1	2	2	1	1	1	1
4	5	3	2	3	3	3	2	3	3	2	1	4	4	3	2	4	4	3	4	4	5	5	5	4	4	4	4	3	3	3	4	4	5	4	4
4	5	4	4	4	2	2	2	2	2	2	3	4	5	4	3	4	2	3	4	5	4	3	3	4	4	4	4	4	4	3	4	4	4	3	3
5	5	5	5	5	4	1	1	1	1	1	1	5	5	5	5	5	4	2	3	3	3	3	3	2	3	3	3	3	3	2	3	3	3	3	3
5	5	5	5	5	5	1	1	1	1	1	1	5	5	5	5	5	5	3	2	2	2	3	3	1	2	2	2	3	3	2	2	2	2	3	2
5	4	4	3	4	3	3	4	3	3	3	2	5	4	4	3	4	4	4	4	5	4	4	3	5	4	4	3	4	3	3	3	4	3	3	3
5	4	3	3	3	2	1	1	2	2	3	4	5	4	3	4	3	2	4	5	3	3	2	2	4	5	4	3	3	2	4	5	3	3	2	2
4	4	4	3	3	3	2	2	1	2	2	2	5	4	4	3	2	3	4	3	2	2	2	2	4	4	3	3	2	2	4	3	3	3	2	2
5	5	5	4	2	2	2	5	3	3	2	2	5	5	5	3	2	2	3	4	4	3	2	3	4	4	4	3	3	2	3	4	3	2	2	2
4	3	2	2	1	1	2	2	2	2	1	3	3	2	1	1	1	1	4	5	5	5	5	5	2	1	1	1	1	2	1	1	2	2	2	3
