# Supplementary material for: Affective Face Processing Modified by Different Tastes
Source: Front Psychol. 2021 Mar 12;12:644704. doi: 10.3389/fpsyg.2021.644704 (PMC8006344; doi:10.3389/fpsyg.2021.644704)
Supplement: Supplementary file 2 [file Data_Sheet_2.xlsx]

## Sheet: Sheet1
subject	PoNuS	PoNuA	PoNegS	PoNegA	NegNuS	NegNuA	NegPoS	NegPoA
1	526.902	447.773	559.358	510.794	570.43	578.235	665.585	570.4
2	507.306	479.604	686.611	694.056	784.542	695	808.113	751.193
3	542.431	637.364	668.083	664.762	948.838	897.535	833.19	843.426
4	411.588	519.95	550.072	731.849	677.119	655.03	673.417	847.838
5	597.468	538.029	671.279	595.207	652.935	667.848	794.457	655.614
6	446.111	423.803	578.615	617.629	682.326	676.713	704.419	671.992
7	541.236	575.25	668.245	697.951	680.706	736.021	803.472	885.341
8	453.854	637.576	713.091	849.655	820.362	774.135	751.565	906
9	619.479	490.31	654.624	517.606	662.037	759.29	916.152	650.25
10	571.8	562.582	733.233	918.853	1019.76	781	846.764	834.756
mean	521.818	531.224	648.321	679.836	749.905	722.081	779.713	761.681
std	64.2639	69.6515	60.5407	124.642	135.11	83.3453	76.384	111.344
